# Supplementary material for: A multifunctional Schiff base fluorescence sensor for Hg2+, Cu2+ and Co2+ ions
Source: Royal Society of Chemistry journal article supplement (doi:10.1039/c6ra24704k), 2017-01-01
Supplement: c6ra24704k1.pdf [file c6ra24704k1.pdf]

## A multifunctional Schiff base fluorescent sensor for $\text{Hg}^{2+}$ , $\text{Cu}^{2+}$ and $\text{Co}^{2+}$ ions

Yi-Wun Sie, Chin-Feng Wan, An-Tai Wu

### Supplementary Data

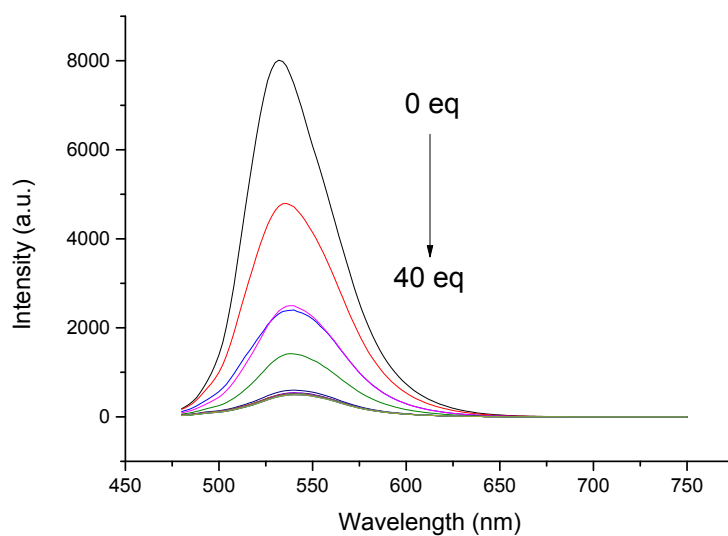

**Fig. S1.** Fluorescence spectra of receptor (20 μM) in H<sub>2</sub>O/DMSO=1/9 (v/v) upon addition of increasing concentrations  $\text{Cu}^{2+}$

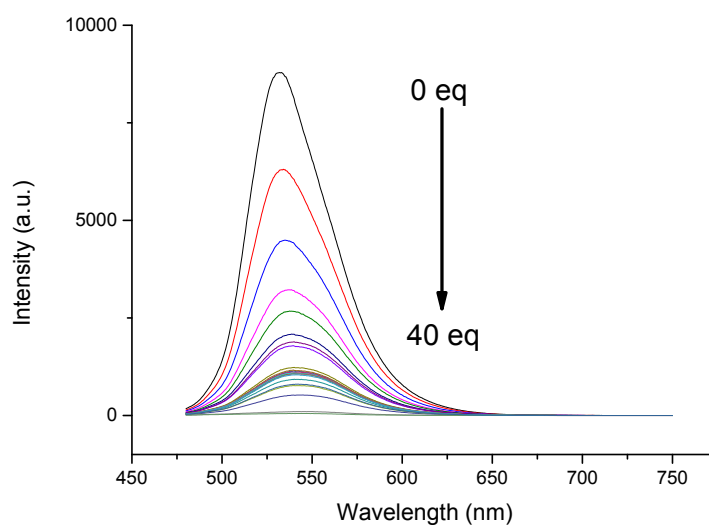

**Fig. S2.** Fluorescence spectra of receptor (20 μM) in H<sub>2</sub>O/DMSO=1/9 (v/v) upon addition of increasing concentrations  $\text{Co}^{2+}$

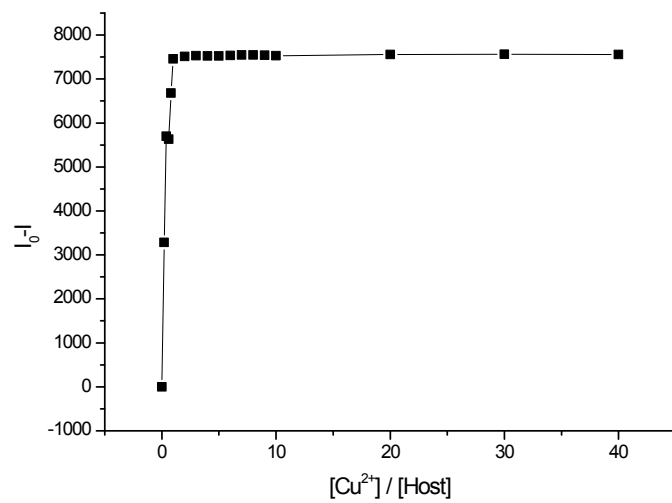

**Fig. S3.** Stern-Volmer plot

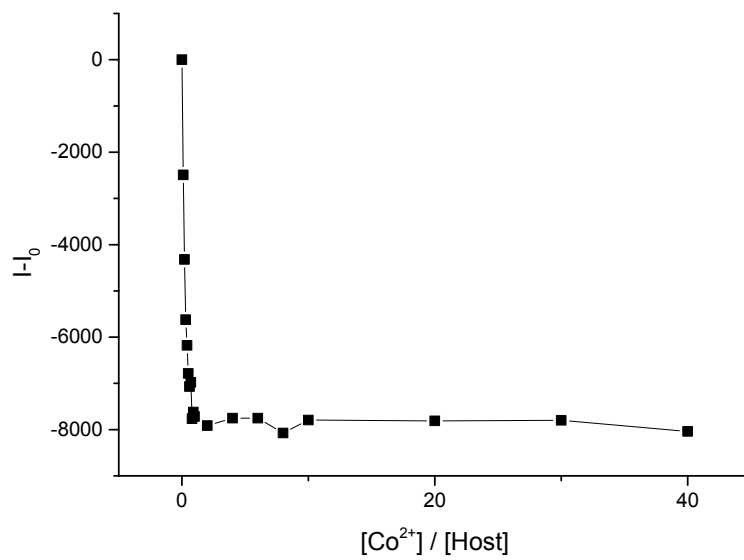

**Fig. S4.** Stern-Volmer plot

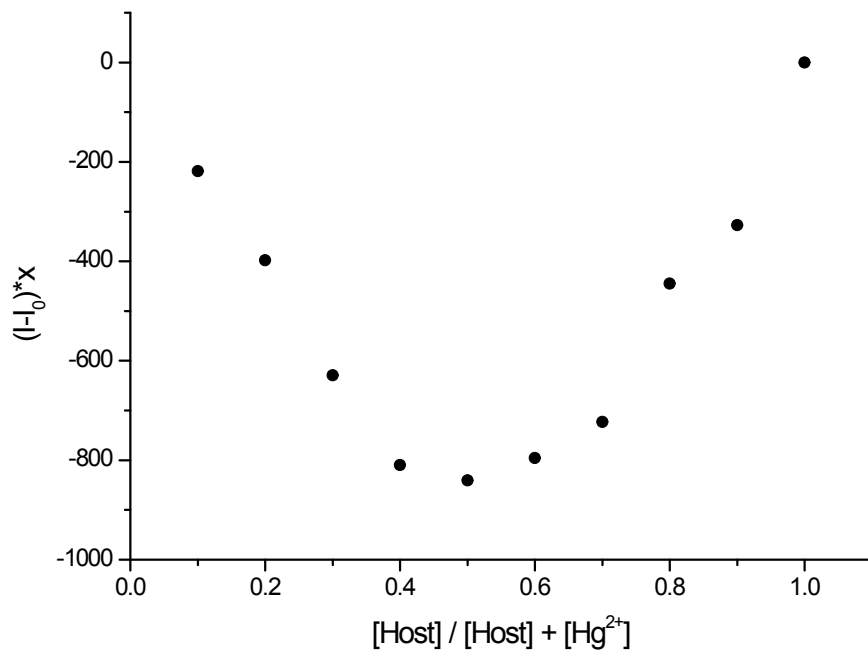

**Fig. S5.** The Job's plot examined between receptor **L** and Hg<sup>2+</sup> by fluorescence.

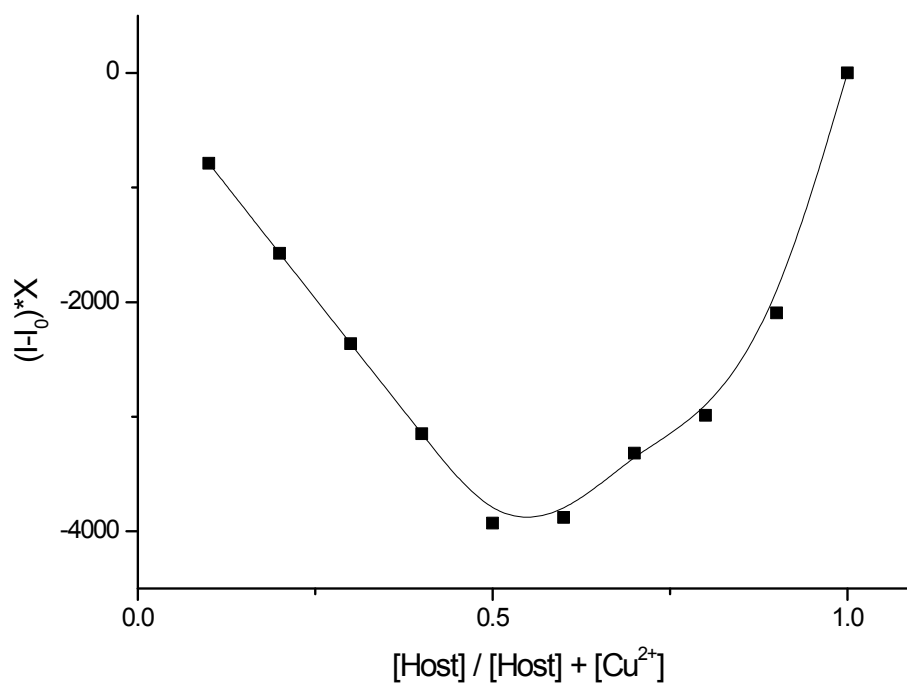

**Fig. S6.** The Job's plot examined between receptor **L** and Cu<sup>2+</sup> by fluorescence.

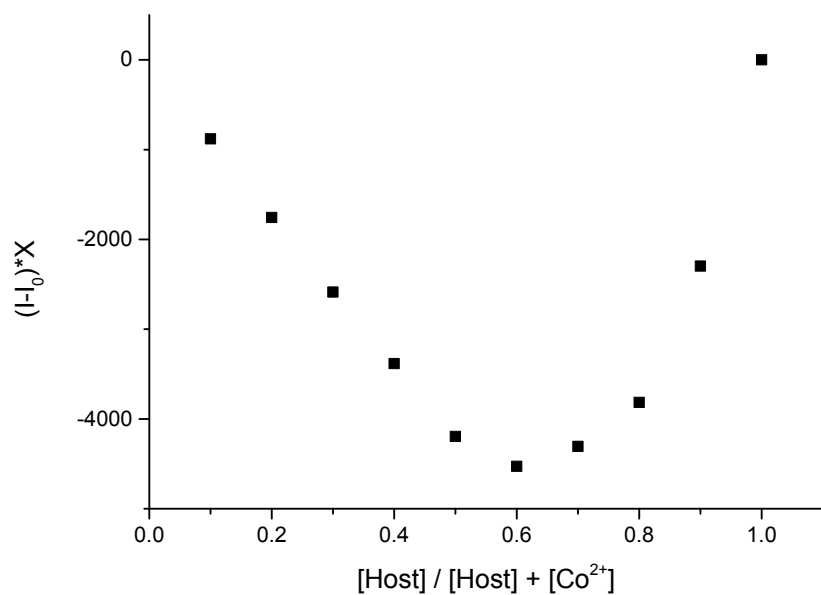

**Fig. S7.** The Job's plot examined between receptor L and Co<sup>2+</sup> by fluorescence.

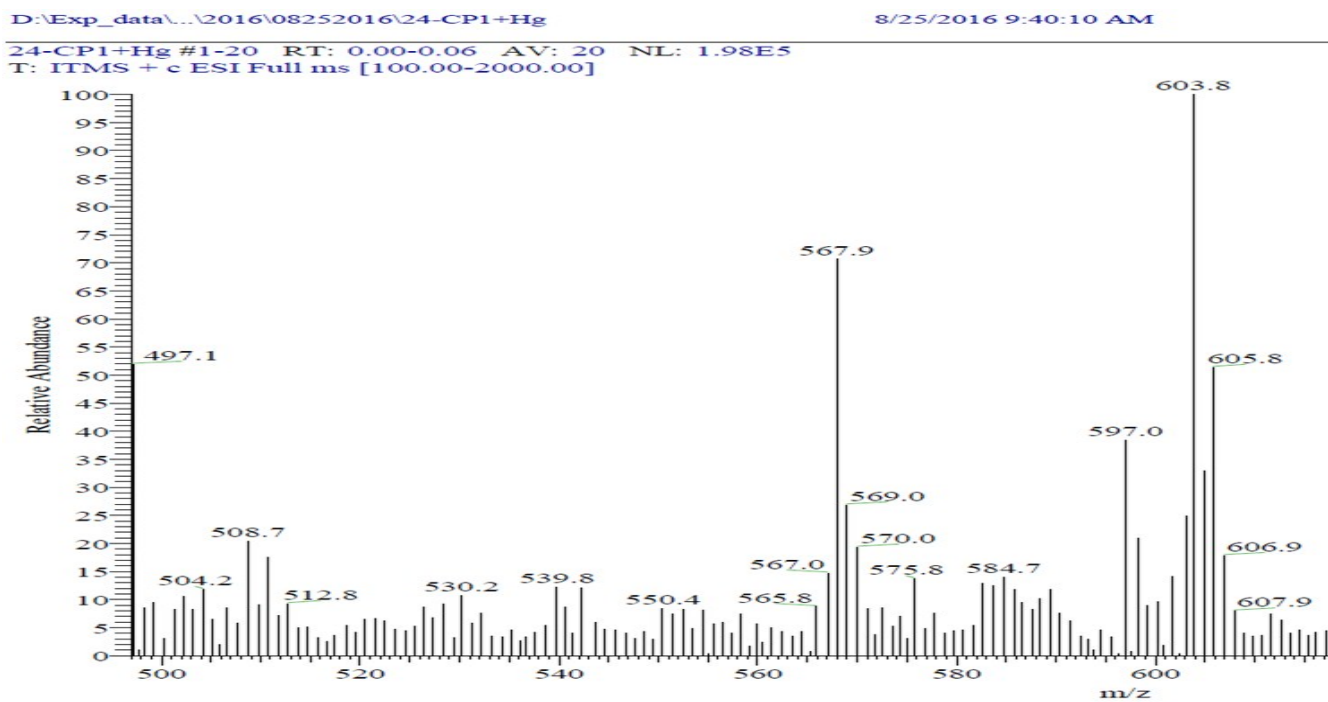

**Fig. S8** ESI Mass [receptor L + Hg<sup>2+</sup>]

15-Cp1+Cu #1-20 RT: 0.00-0.06 AV: 20 NL: 2.26E5  
T: ITMS + c ESI Full ms [150.00-2000.00]

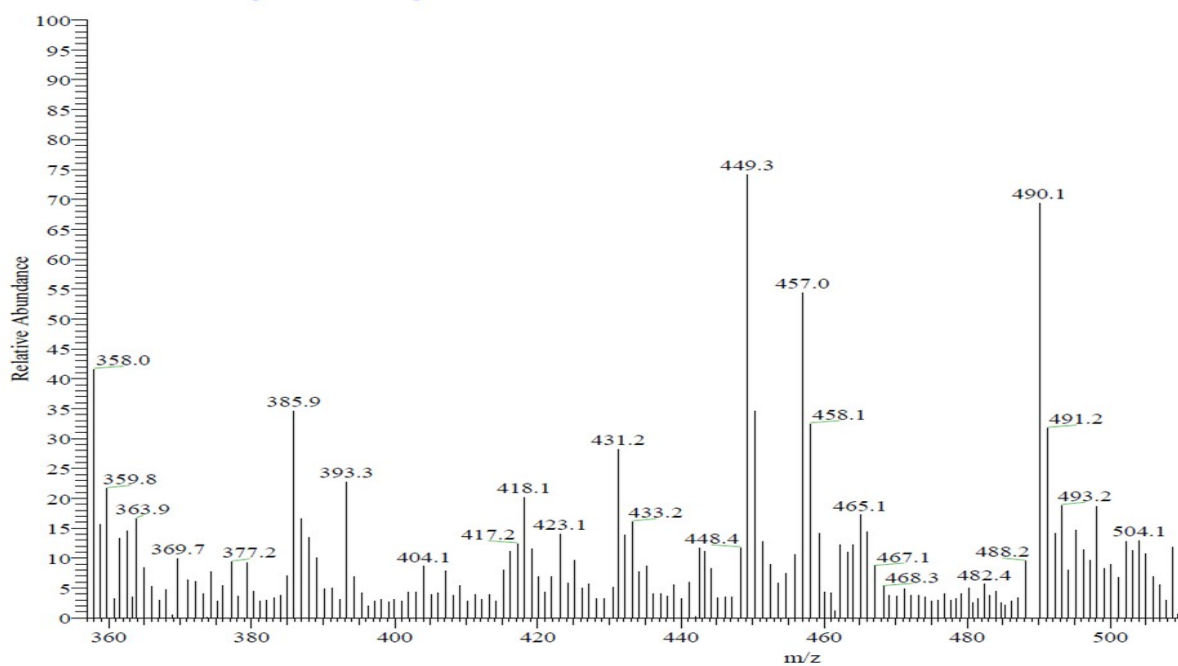

**Fig. S9** ESI Mass [receptor L + Cu<sup>2+</sup>]

43-CP1+Co #1-20 RT: 0.00-0.07 AV: 20 NL: 7.52E4  
T: ITMS - c ESI Full ms [100.00-2000.00]

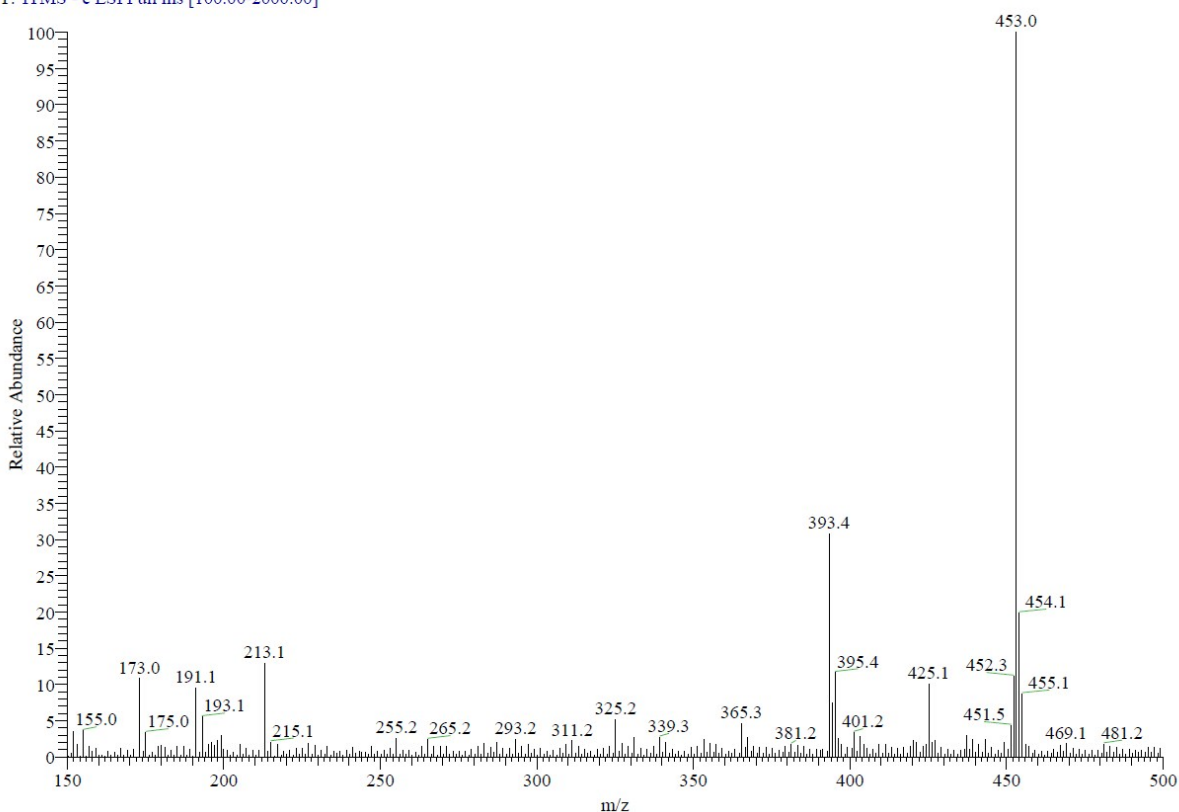

**Fig. S10** ESI Mass [receptor L + Co<sup>2+</sup>]

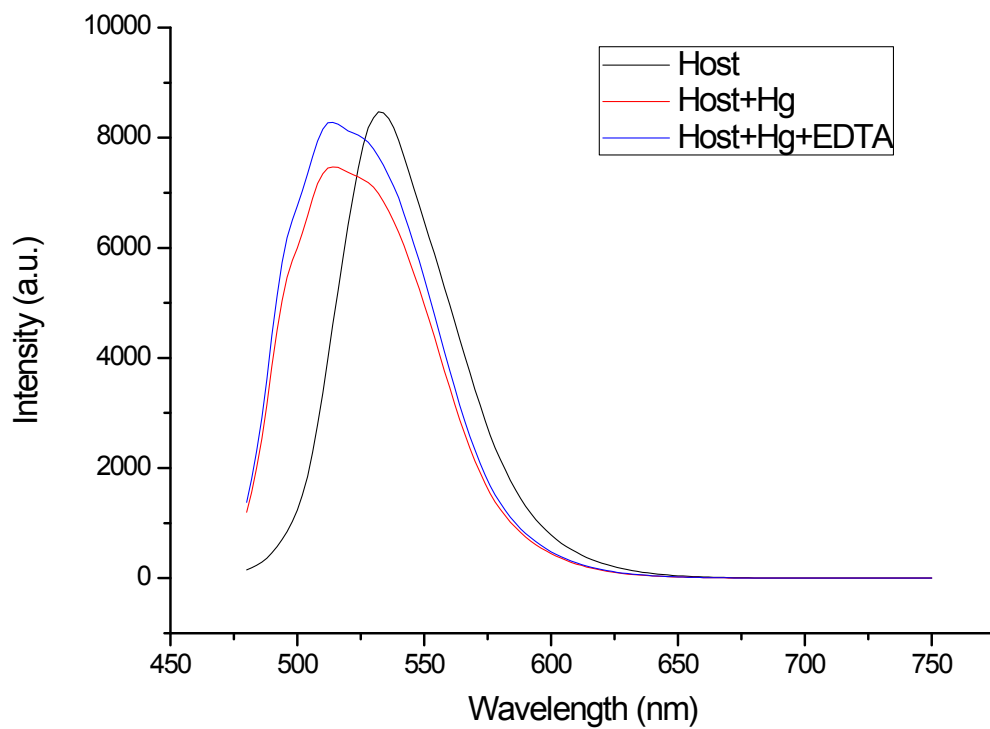

**Fig. S11.** Receptor L reversible reaction in the presence of  $\text{Hg}^{2+}$  (5 equiv.) and EDTA (5 equiv.) tested.

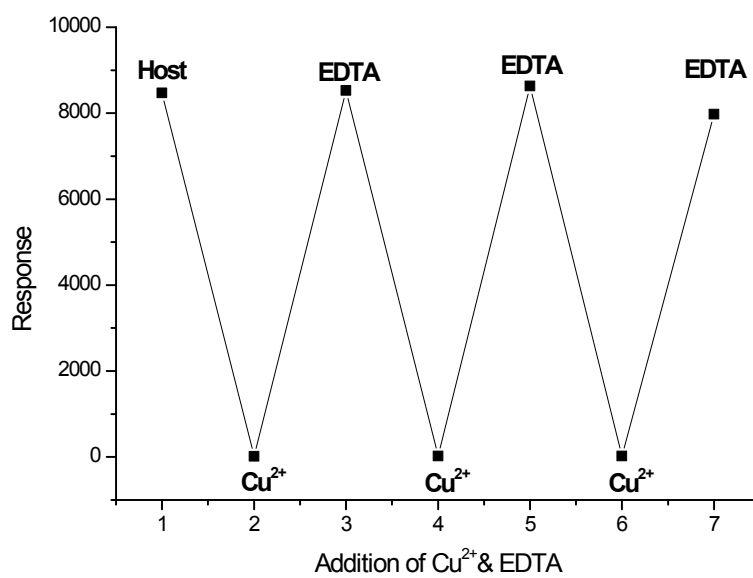

**Fig. S12.** Reversibility experiment of receptor L (20  $\mu\text{M}$ ) in the presence of  $\text{Cu}^{2+}$  (5 equiv.) and EDTA (5 equiv.) tested.

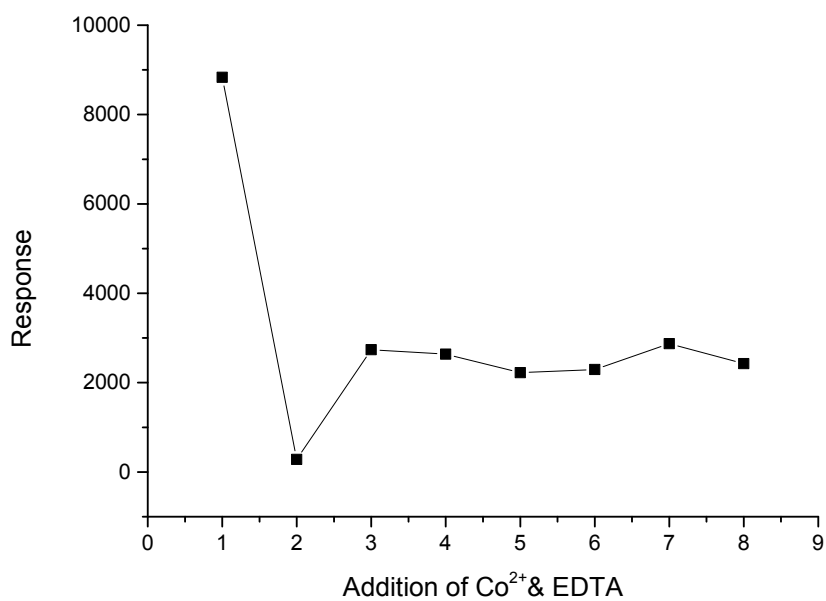

**Fig. S13.** Reversibility experiment of receptor **L** (20  $\mu$ M) in the presence of  $\text{Co}^{2+}$  (5 equiv.) and EDTA (5 equiv.) tested.

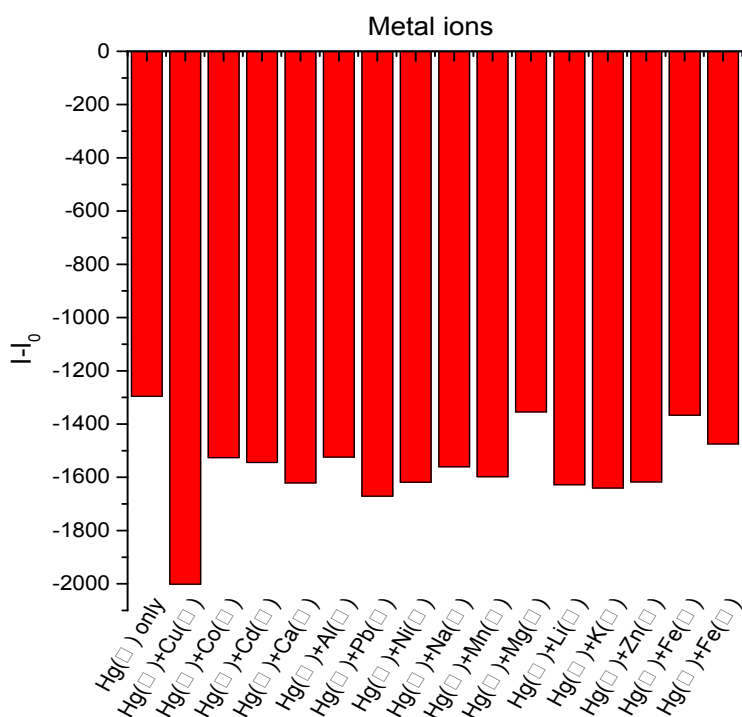

**Fig. S14.** Competition experiment of receptor **L** towards  $\text{Hg}^{2+}$  in the presence of 5.0 equiv. of other metal ions.

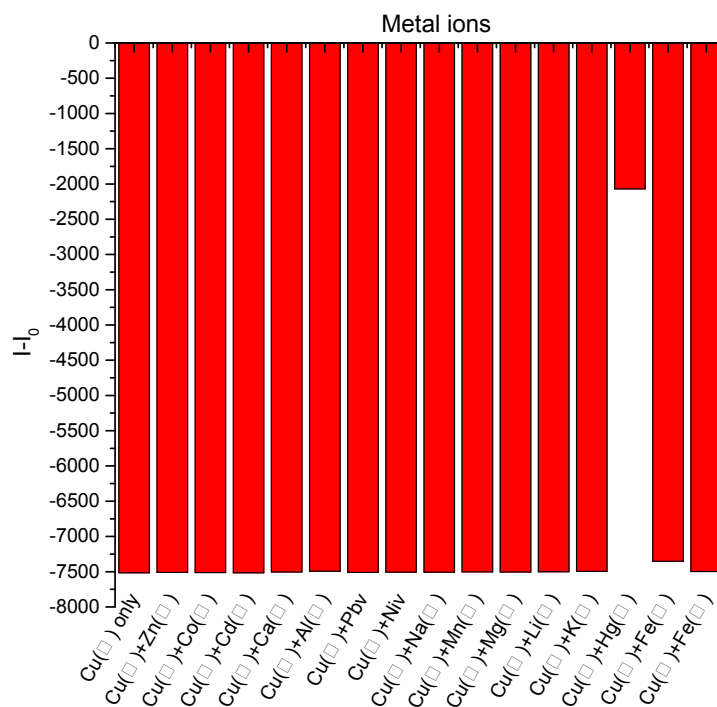

**Fig. S15.** Competition experiment of receptor L towards  $\text{Cu}^{2+}$  in the presence of 5.0 equiv. of other metal ions.

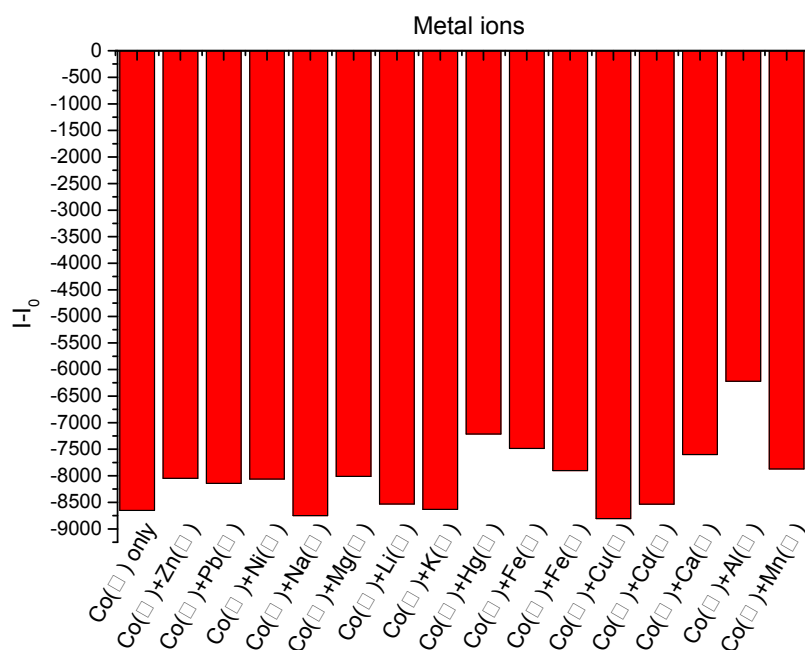

**Fig. S16.** Competition experiment of receptor L towards  $\text{Co}^{2+}$  in the presence of 5.0 equiv. of other metal ions.



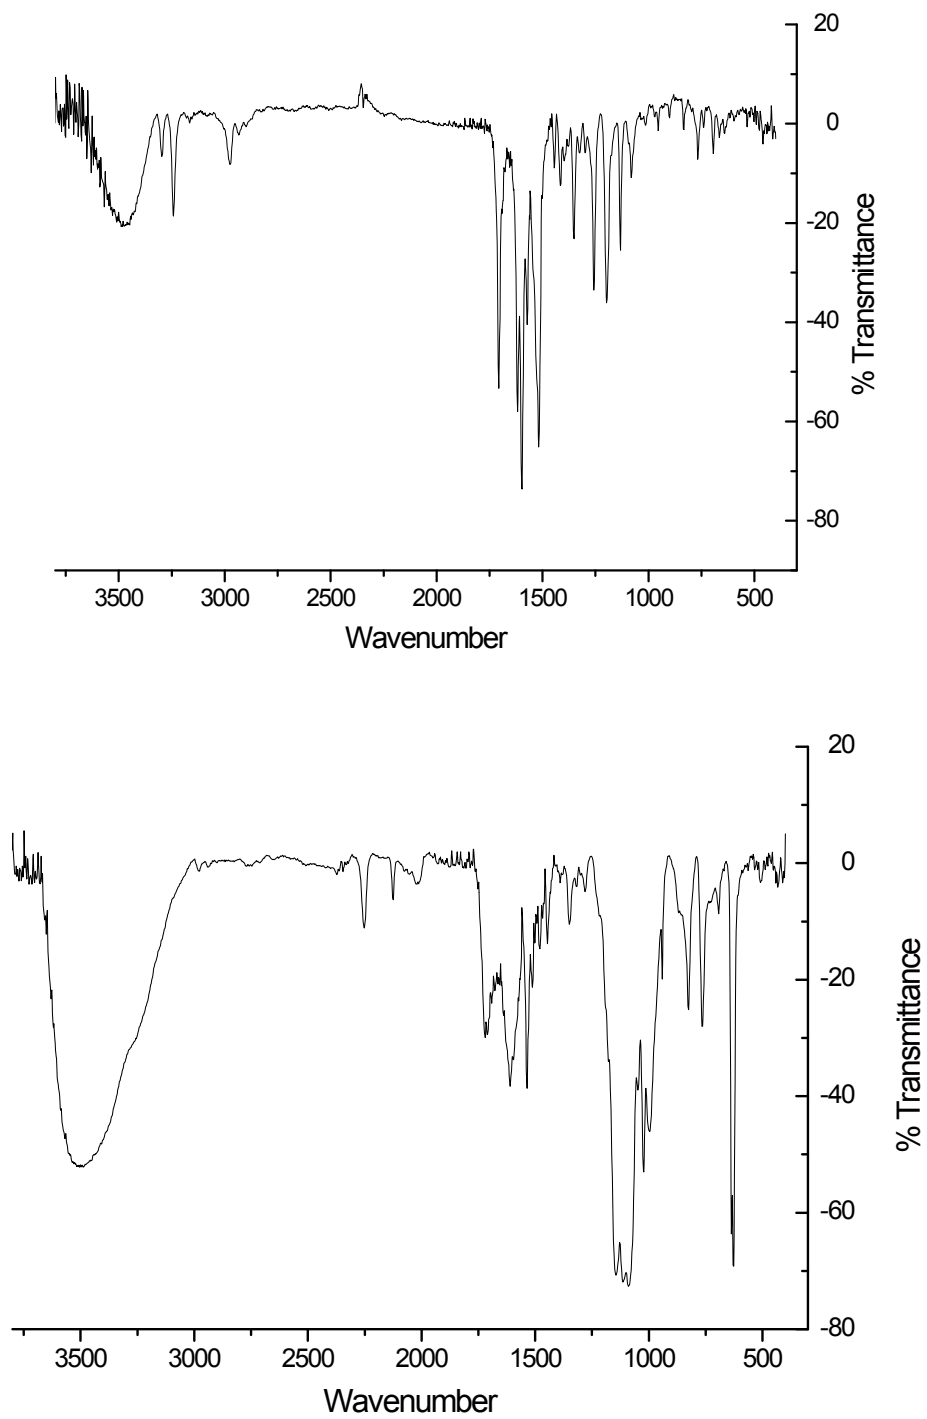

**Fig. S17.** The IR spectra for (a) receptor **FT** and (b) [receptor **FT** + Hg<sup>+2</sup>] adduct from top to bottom.
